# Supplementary material for: Discovery of C-3 Tethered 2-oxo-benzo[1,4]oxazines as Potent Antioxidants: Bio-Inspired Based Design, Synthesis, Biological Evaluation, Cytotoxic, and in Silico Molecular Docking Studies
Source: PubMed Central journal article supplement (PMC5876303; doi:10.3389/fchem.2018.00056), 2018-03-23

## Supplementary Material

# Discovery of C-3 tethered 2-oxo-benzo[1,4]oxazines as potent antioxidants: Bio-inspired based design, synthesis, biological evaluation, cytotoxic and Insilico molecular docking studies

Vashundhra Sharma,<sup>1,‡</sup> Pradeep K. Jaiswal,<sup>1,‡</sup> Mukesh Saran,<sup>2</sup> Dharmendra K. Yadav,<sup>3,\*</sup> Saloni,<sup>3</sup> Manas Mathur,<sup>2</sup> Ajit K. Swami,<sup>2</sup> Sanjeev Misra,<sup>4</sup> Mi-hyun Kim,<sup>3</sup> and Sandeep Chaudhary,<sup>1,\*</sup>

<sup>1</sup>Laboratory of Organic and Medicinal Chemistry, Department of Chemistry, Malaviya National Institute of Technology, Jawaharlal Nehru Marg, Jaipur-302017, India.

<sup>2</sup>Department of Advance Molecular Microbiology, Seminal Applied Sciences Pvt. Ltd. Jaipur-302015, India.

<sup>3</sup>College of Pharmacy, Gachon University of Medicine and Science, Hambakmoeiro 191, Yeonsu-gu, Incheon city, 406-799, Korea.

<sup>4</sup>Department of Biochemistry, All India Institute of Medical Sciences (AIIMS), Jodhpur, Rajasthan-342005, India.

<sup>‡</sup>Both authors have equal contribution.

**\* Correspondence:**

Corresponding Author: Sandeep Chaudhary

E-mail: [schaudhary.chy@mnit.ac.in](mailto:schaudhary.chy@mnit.ac.in)

Dharmendra K. Yadav

Email: [dharmendra30oct@gmail.com](mailto:dharmendra30oct@gmail.com)

| Contents                                                                                                                                        | Page No. |
|-------------------------------------------------------------------------------------------------------------------------------------------------|----------|
| Copies of characterization spectra of <sup>1</sup> H and <sup>13</sup> C NMR of C-3 tethered 2-oxo-benzo[1,4]oxazines (20b, 20j-t, 20x and 20z) | S2-S15   |
| MTT Assay                                                                                                                                       | S16      |

Keywords: 2-Oxo-benzo[1,4]oxazines; Antioxidant; DPPH, FRAP. Ascorbic acid. BHT

\*Corresponding author. Tel: [+82-32-820-4947](tel:+82-32-820-4947); E-mail: [dharmendra30oct@gmail.com](mailto:dharmendra30oct@gmail.com)

\*Corresponding author. Fax.: 911412529029; Tel: +91-141-2713319; E-mail: [schaudhary.chy@mnit.ac.in](mailto:schaudhary.chy@mnit.ac.in)

Representative characterization spectra ( $^1\text{H}$  and  $^{13}\text{C}$  NMR) of C-3 tethered 2-oxo-benzo[1,4]oxazines (20b, 20j-t, 20x and 20z):

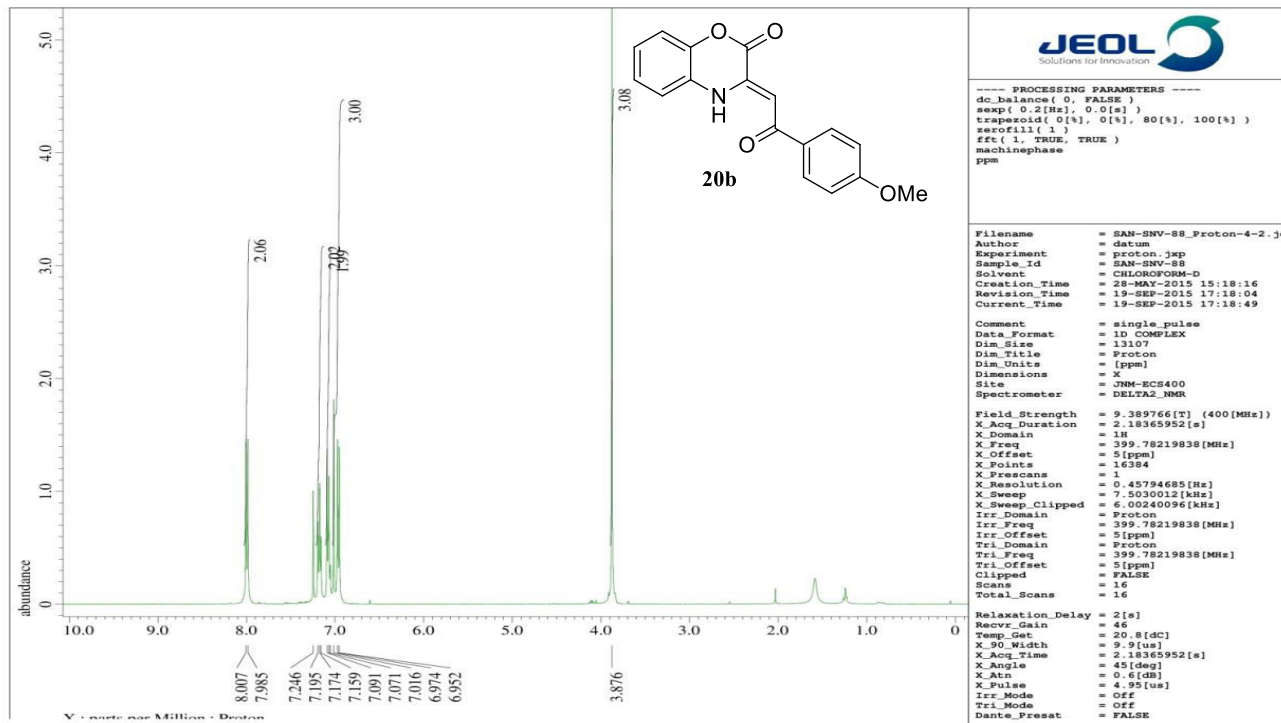

Figure 1.  $^1\text{H}$  NMR Spectra of Compound 20b.

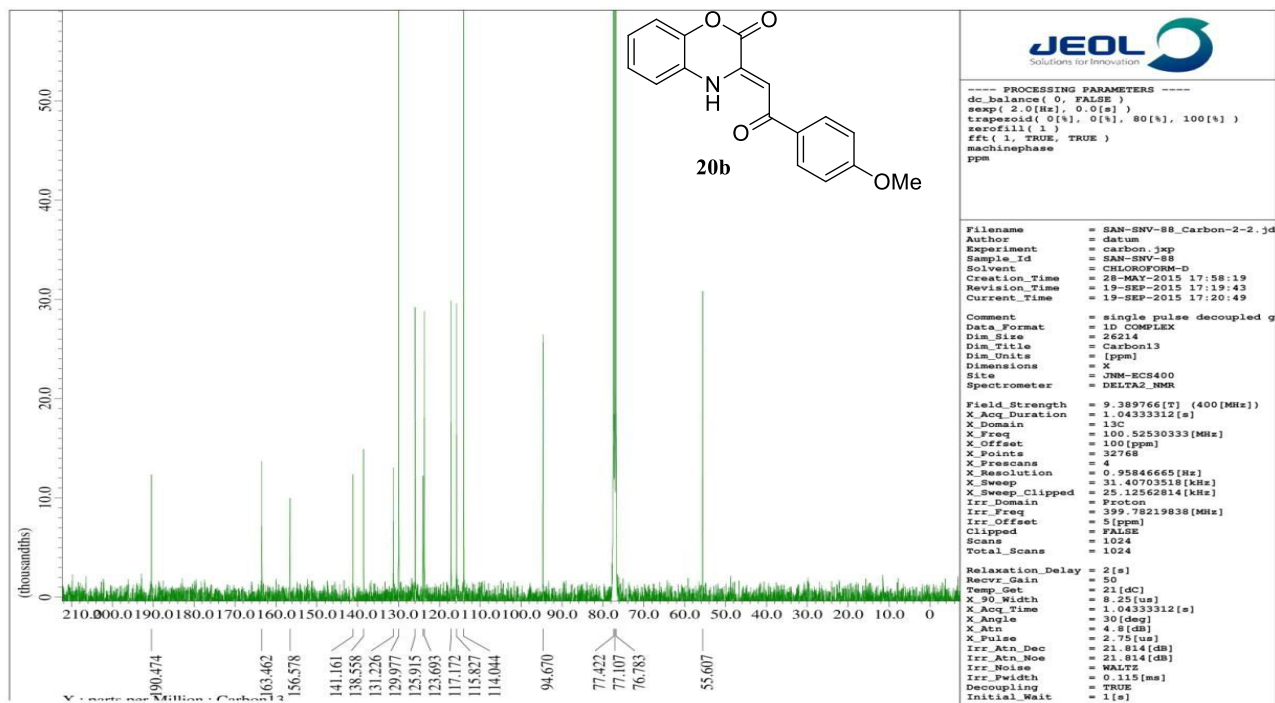

Figure 2.  $^{13}\text{C}$  NMR Spectra of Compound 20b.

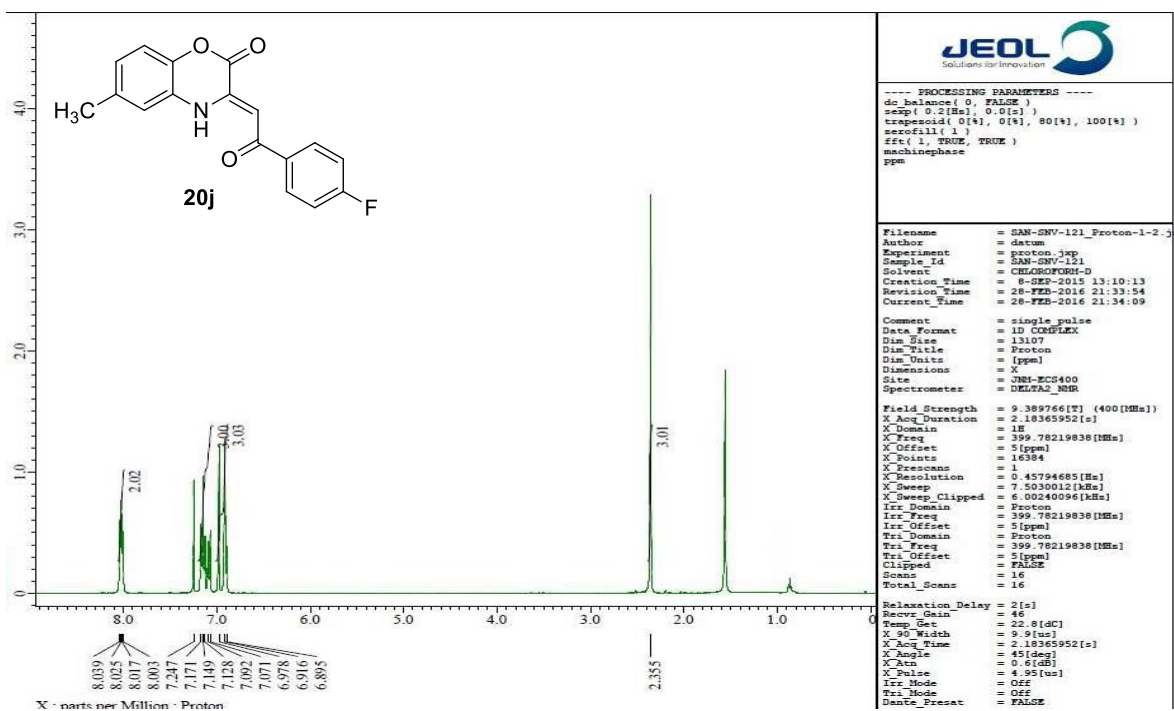

Figure 3. <sup>1</sup>H NMR Spectra of Compound 20j.

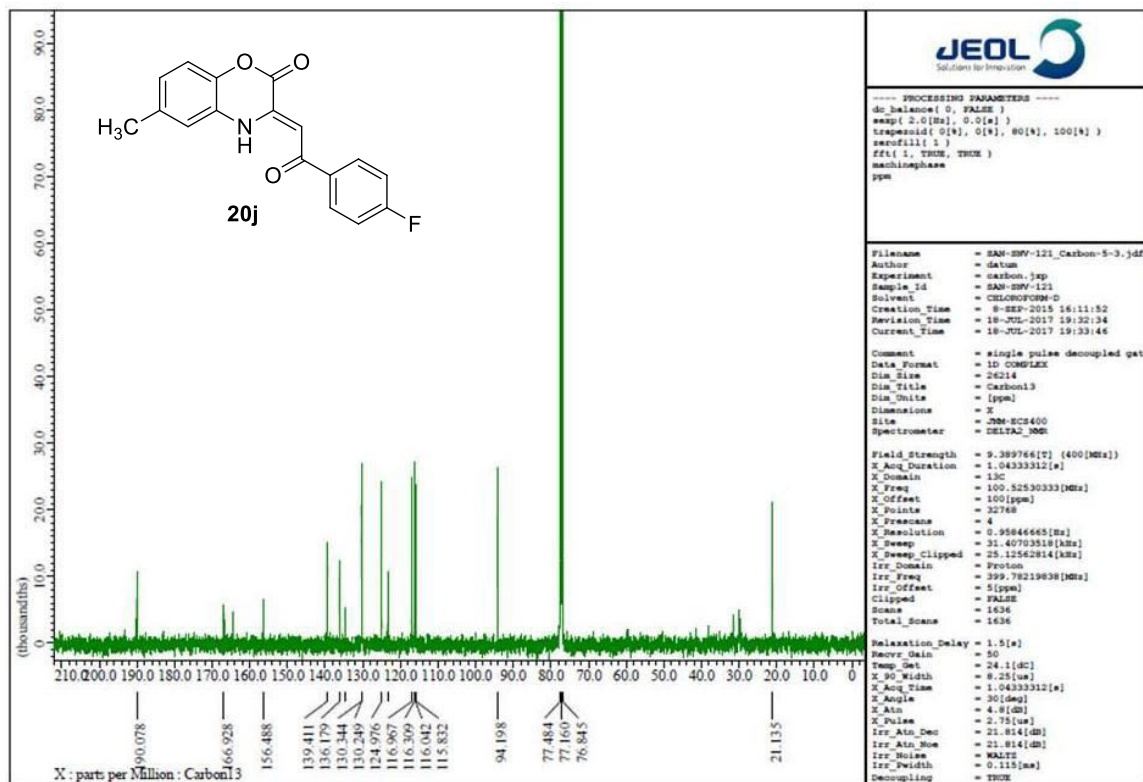

Figure 4. <sup>13</sup>C NMR Spectra of Compound 20j.

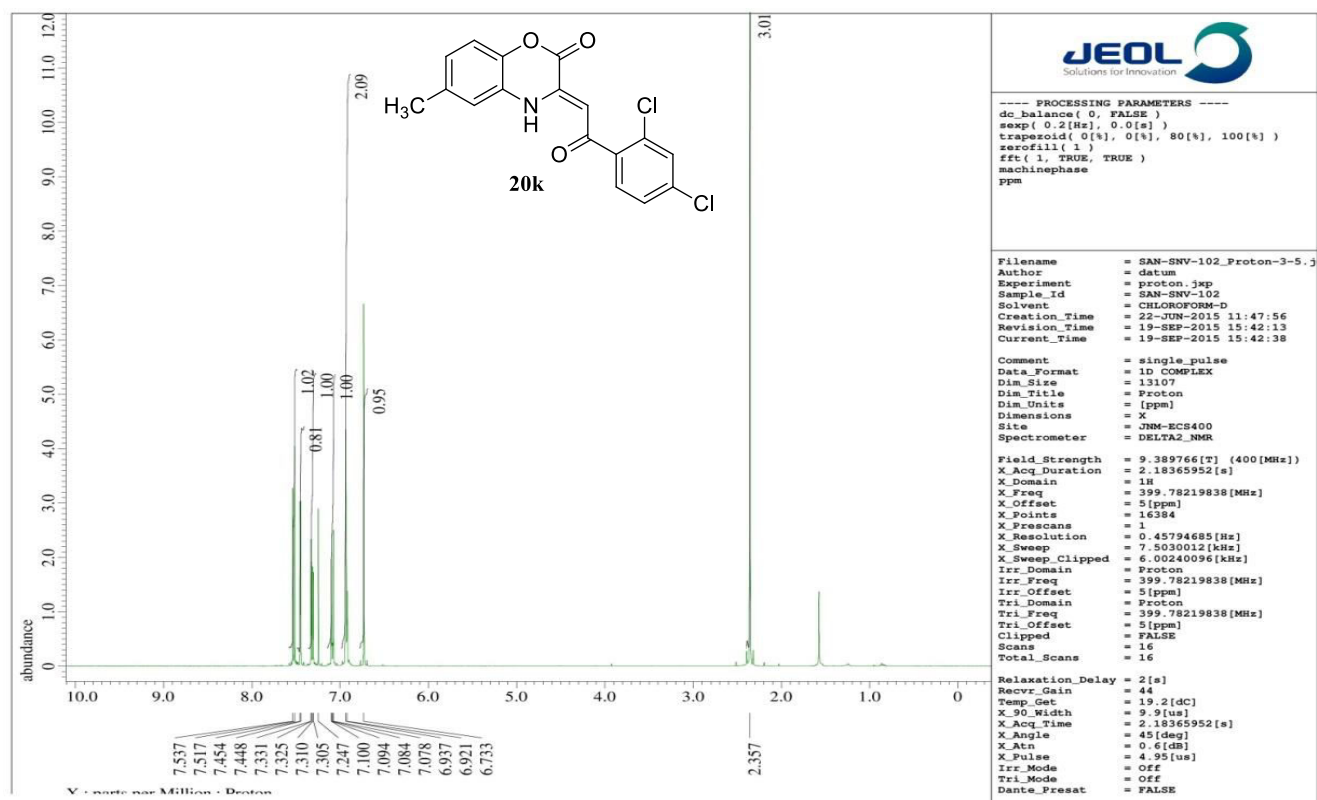Figure 5. <sup>1</sup>H NMR Spectra of Compound 20k.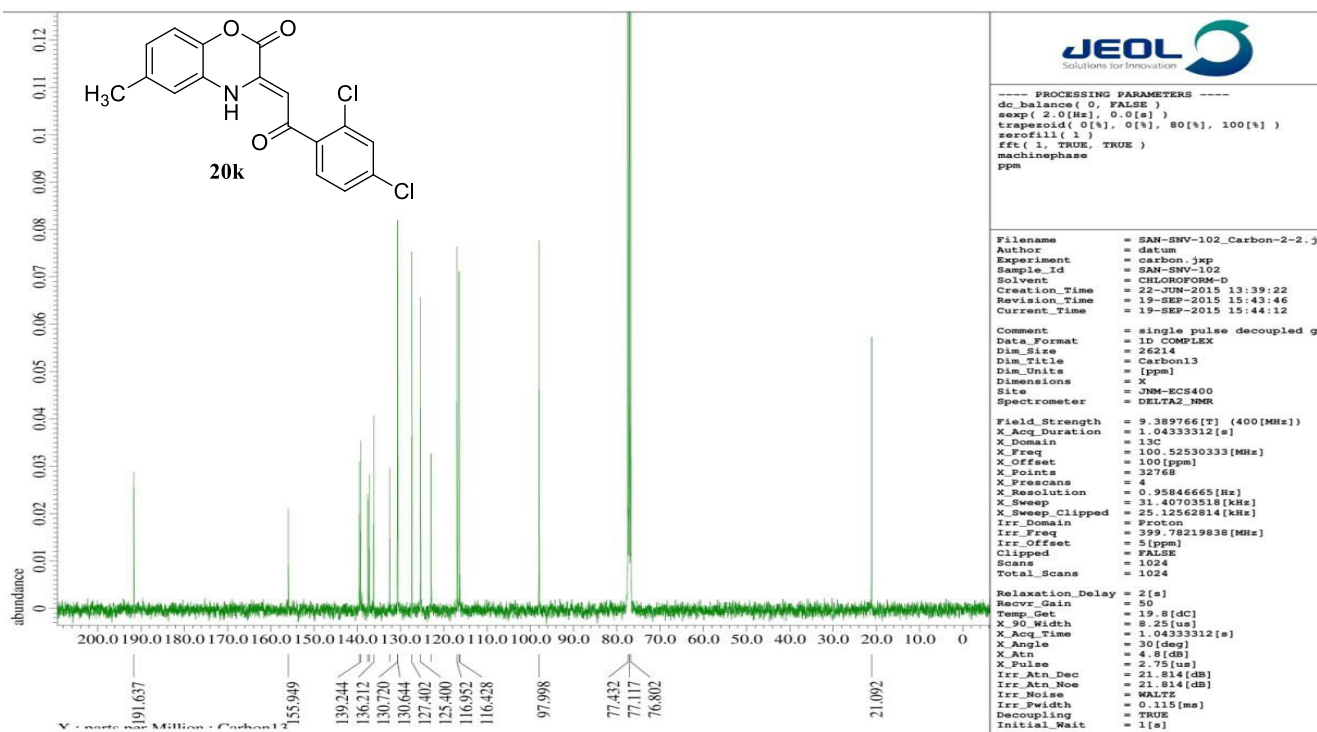Figure 6. <sup>13</sup>C NMR Spectra of Compound 20k.

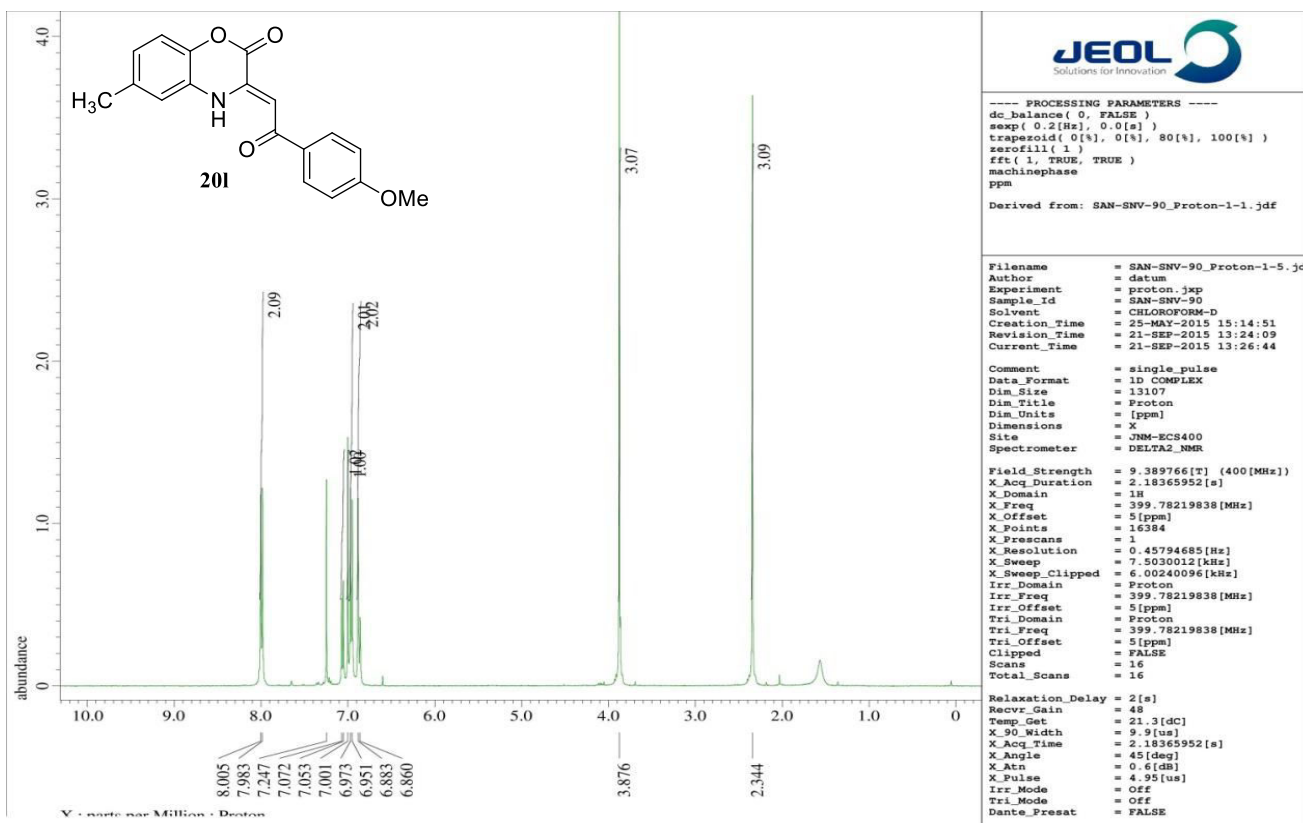

Figure 7. <sup>1</sup>H NMR Spectra of Compound 20l.

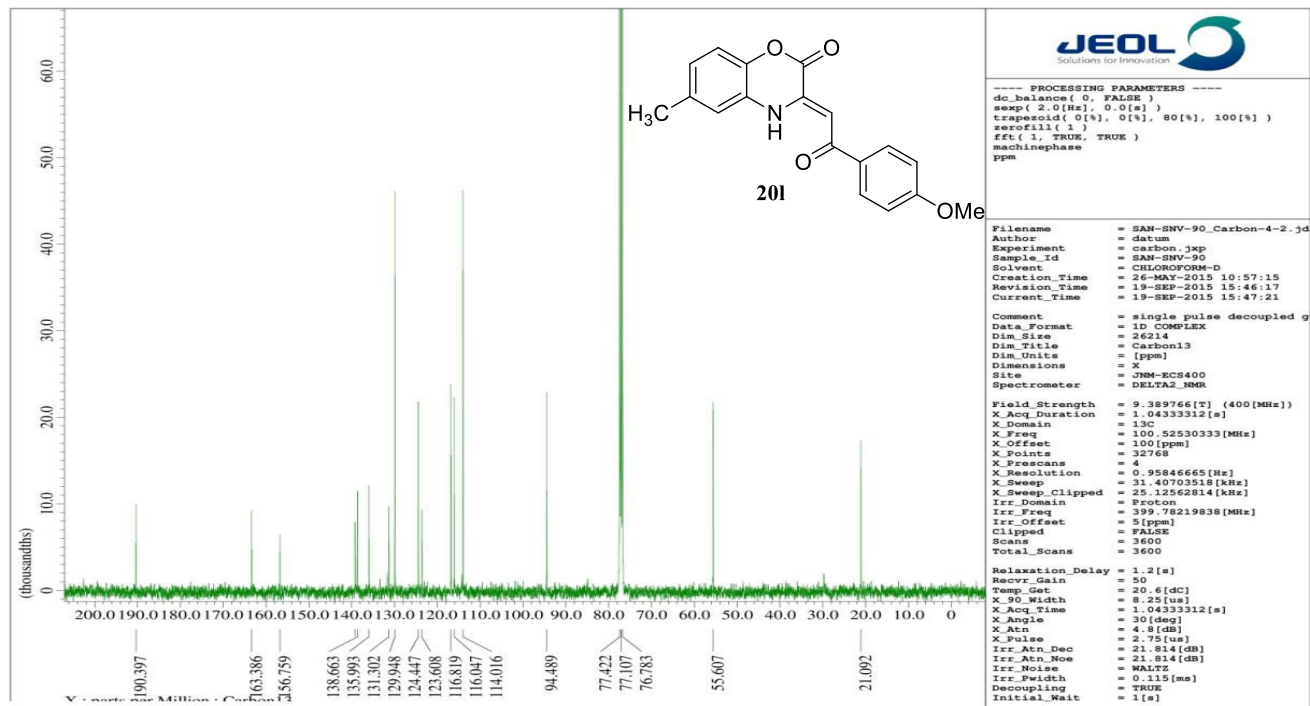

Figure 8. <sup>13</sup>C NMR Spectra of Compound 20l.

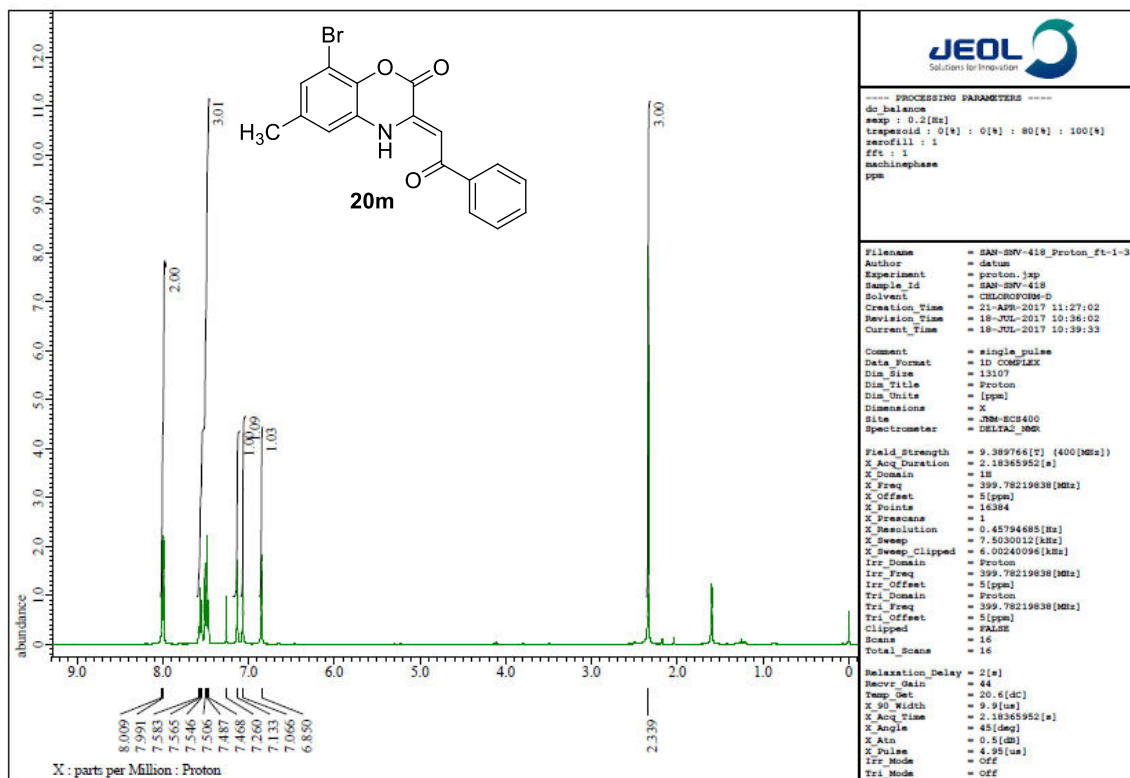

**Figure 9. <sup>1</sup>H NMR Spectra of Compound 20m.**

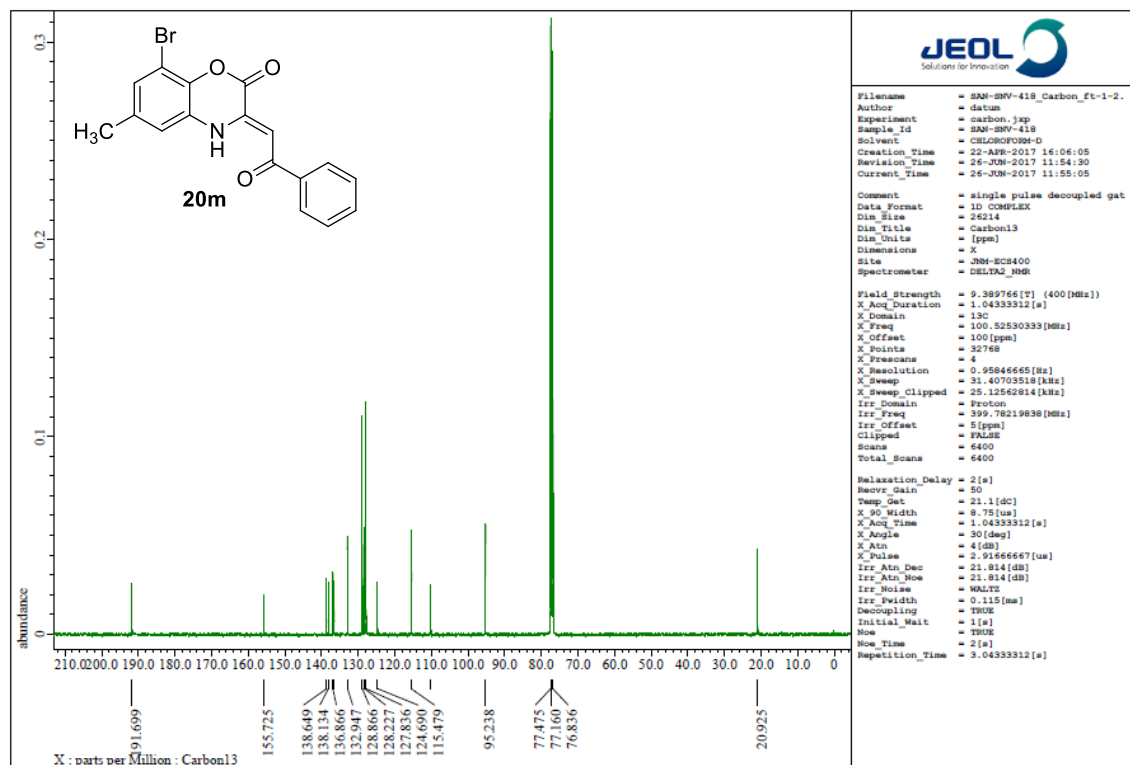

**Figure 10. <sup>13</sup>C NMR Spectra of Compound 20m.**

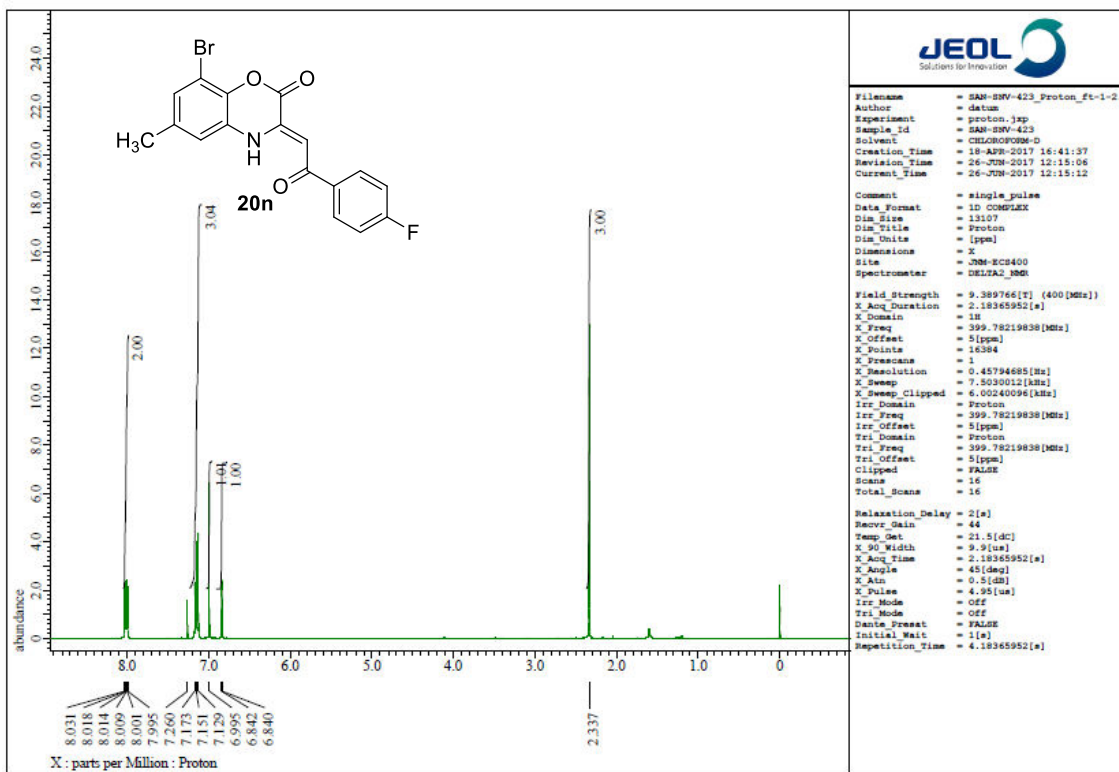

Figure 11. <sup>1</sup>H NMR Spectra of Compound 20n.

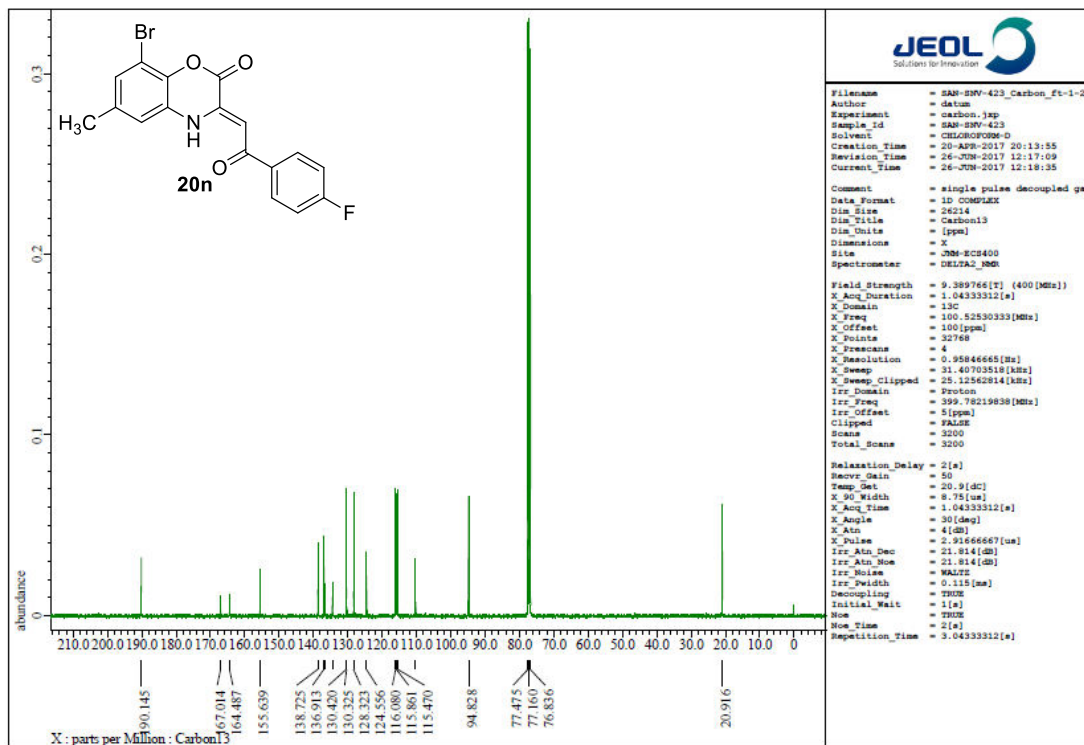

Figure 12. <sup>13</sup>C NMR Spectra of Compound 20n.

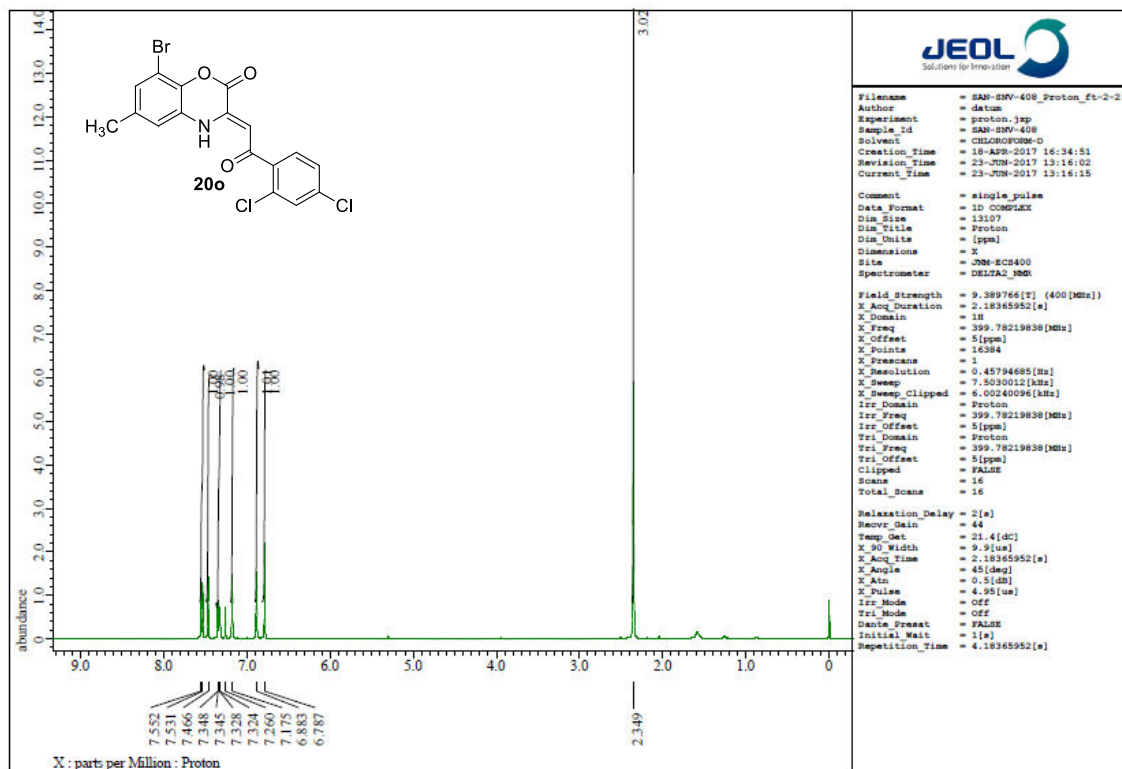

Figure 13. <sup>1</sup>H NMR Spectra of Compound 20o.

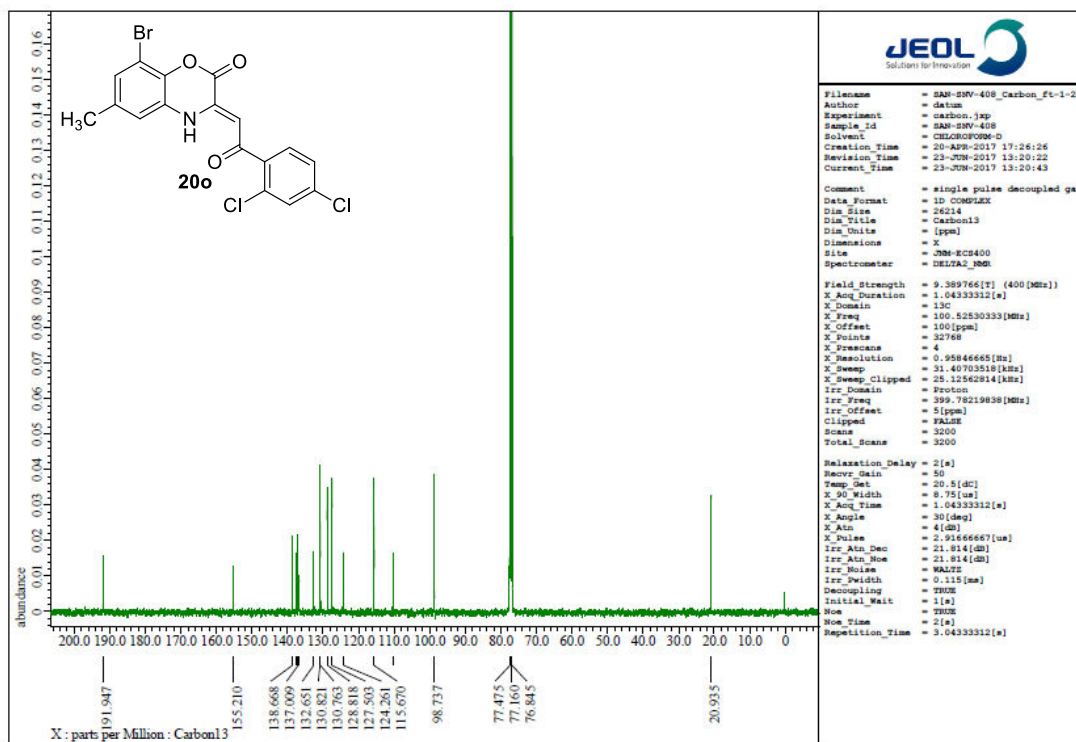

Figure 14. <sup>13</sup>C NMR Spectra of Compound 20o.



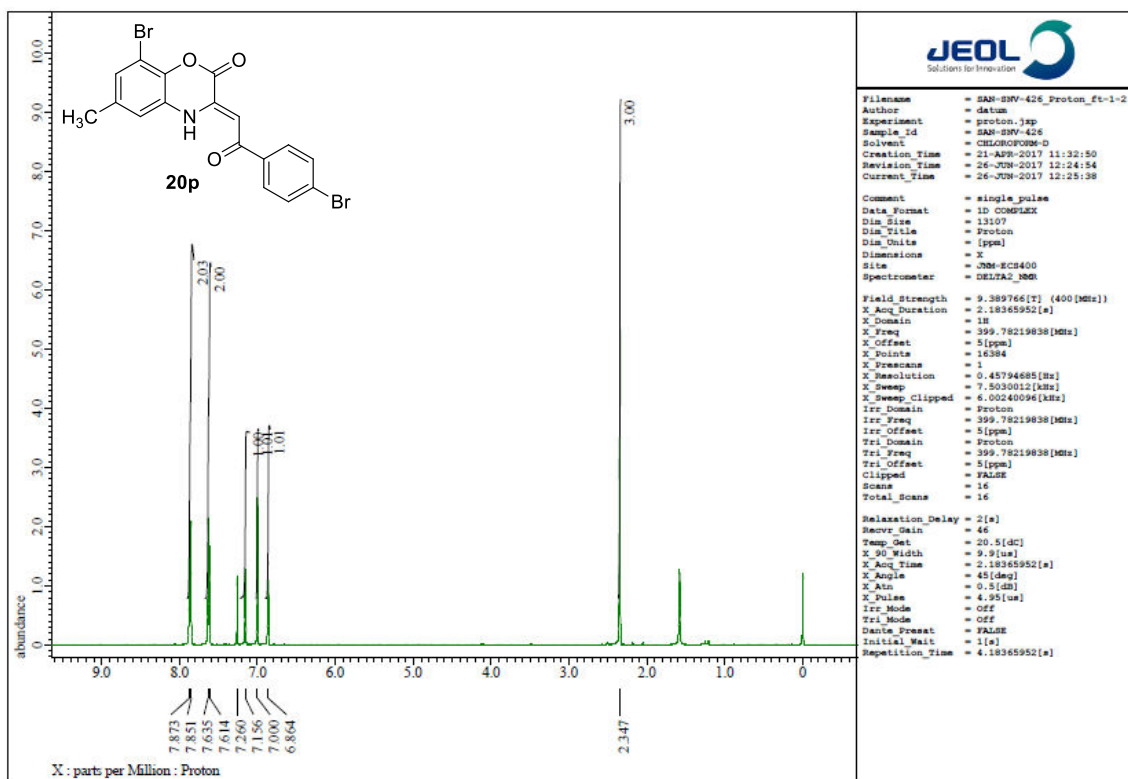

**Figure 15. <sup>1</sup>H NMR Spectra of Compound 20p.**

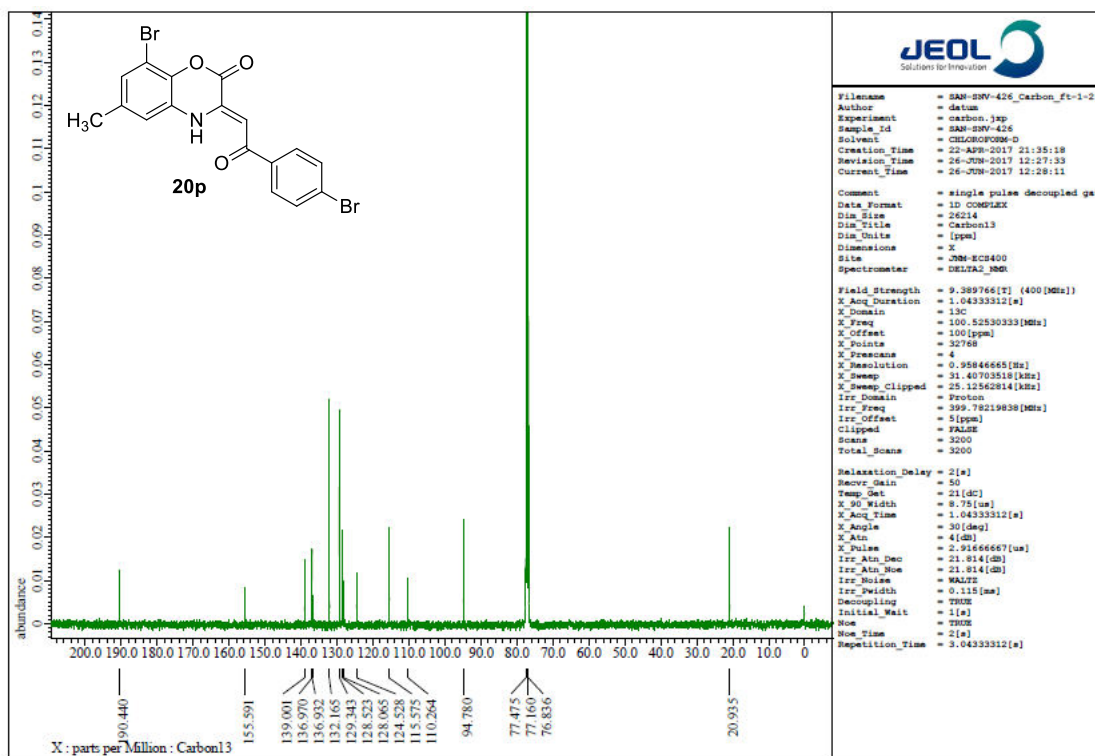

**Figure 16. <sup>13</sup>C NMR Spectra of Compound 20p.**

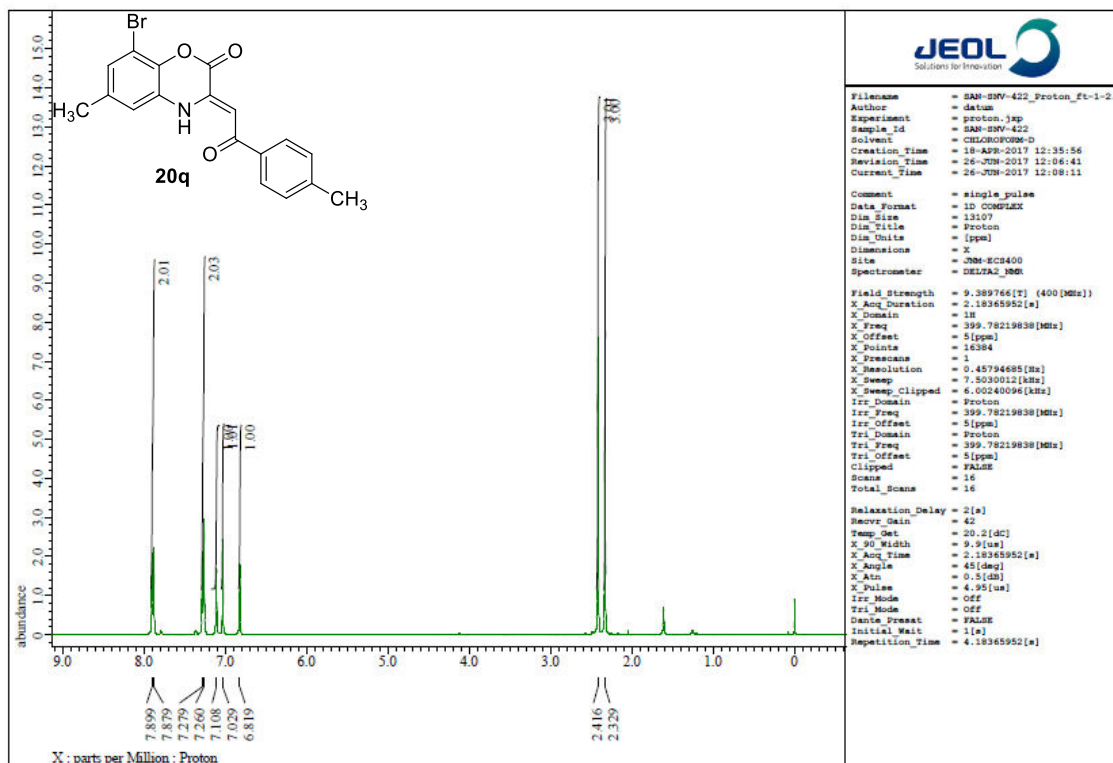

**Figure 17. <sup>1</sup>H NMR Spectra of Compound 20q.**

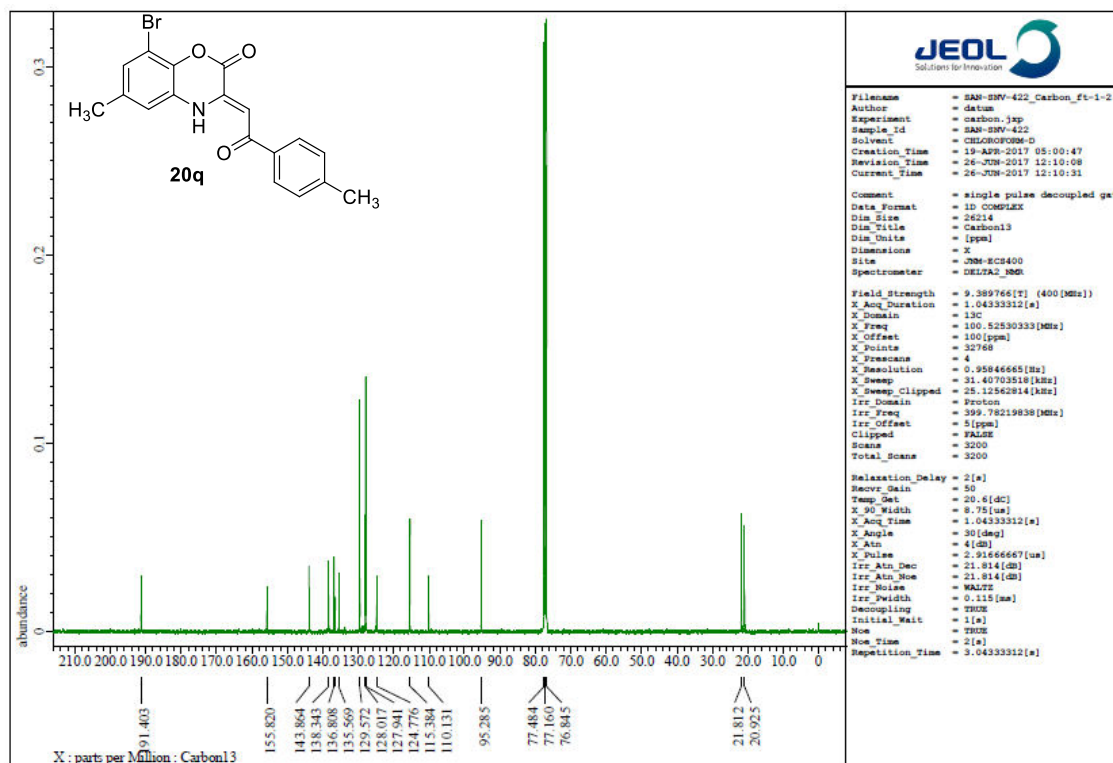

**Figure 18. <sup>13</sup>C NMR Spectra of Compound 20q.**

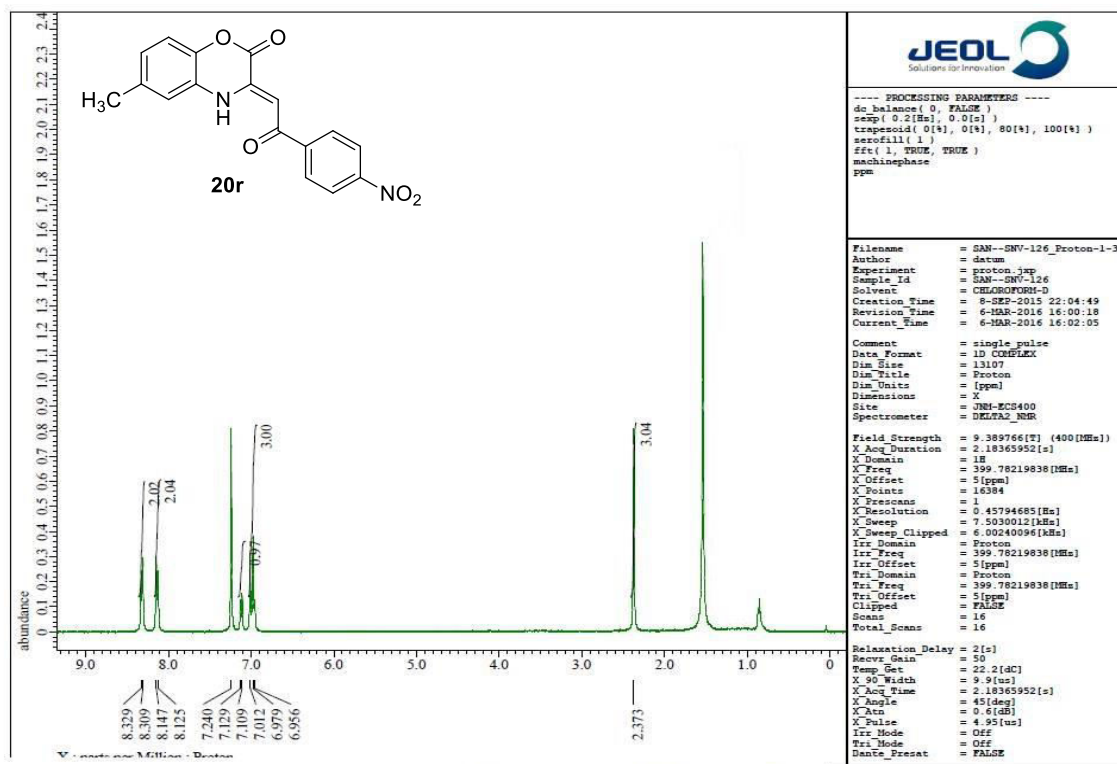

Figure 19. <sup>1</sup>H NMR Spectra of Compound 20r.

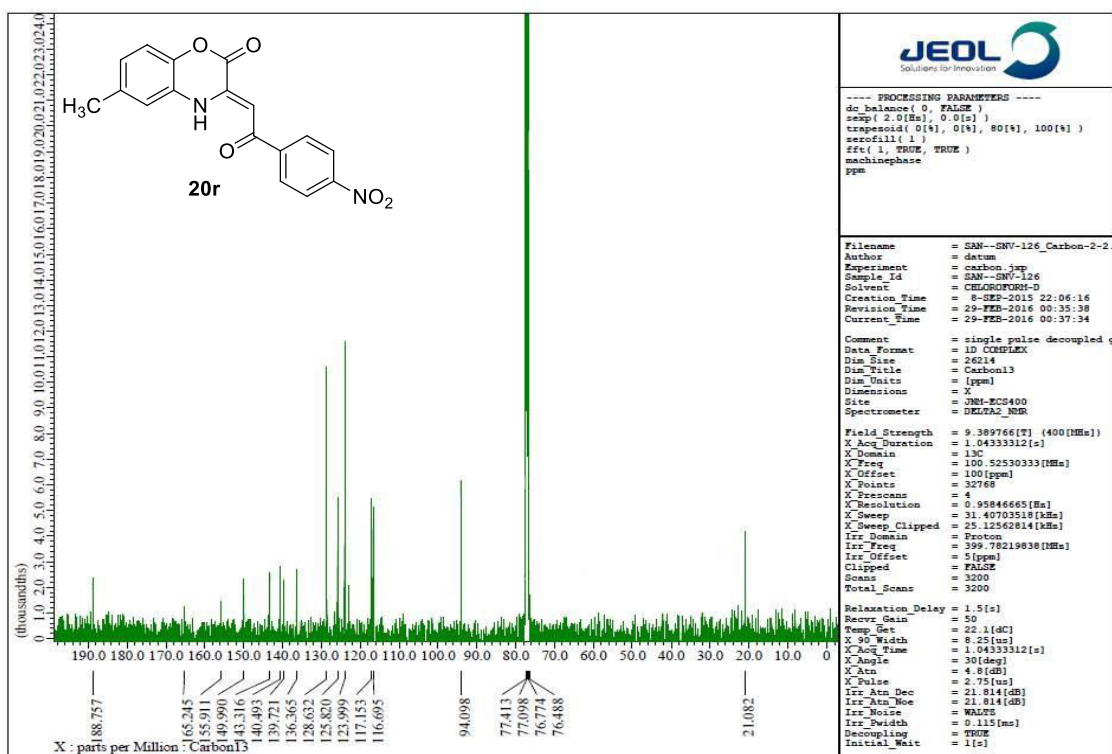

Figure 20. <sup>13</sup>C NMR Spectra of Compound 20r.

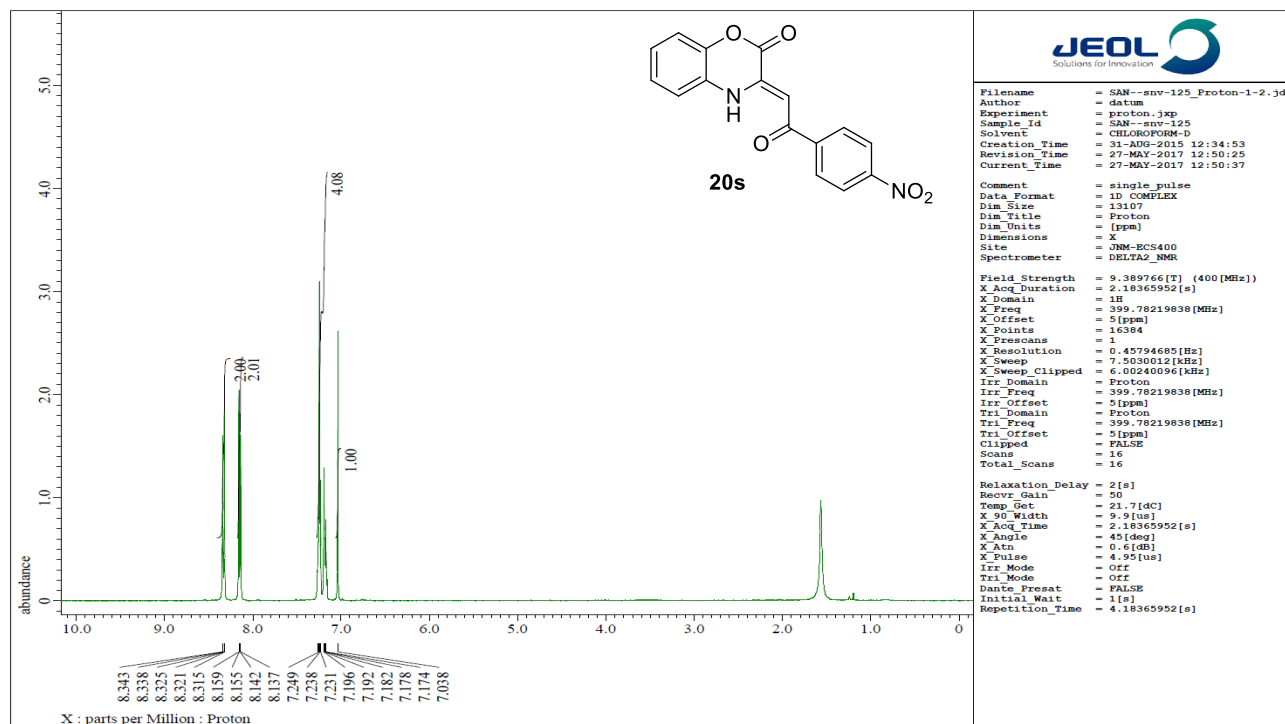Figure 21. <sup>1</sup>H NMR Spectra of Compound 20s.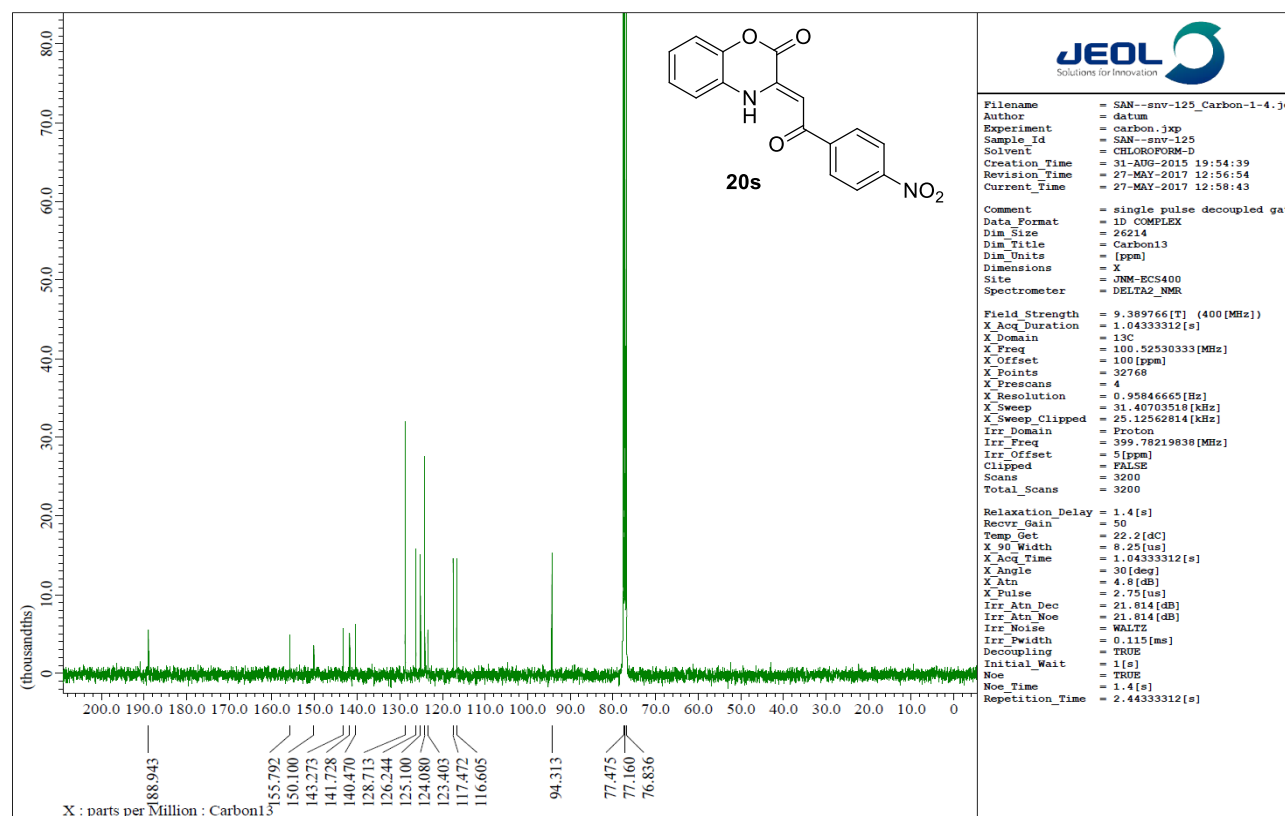Figure 22. <sup>13</sup>C NMR Spectra of Compound 20s.

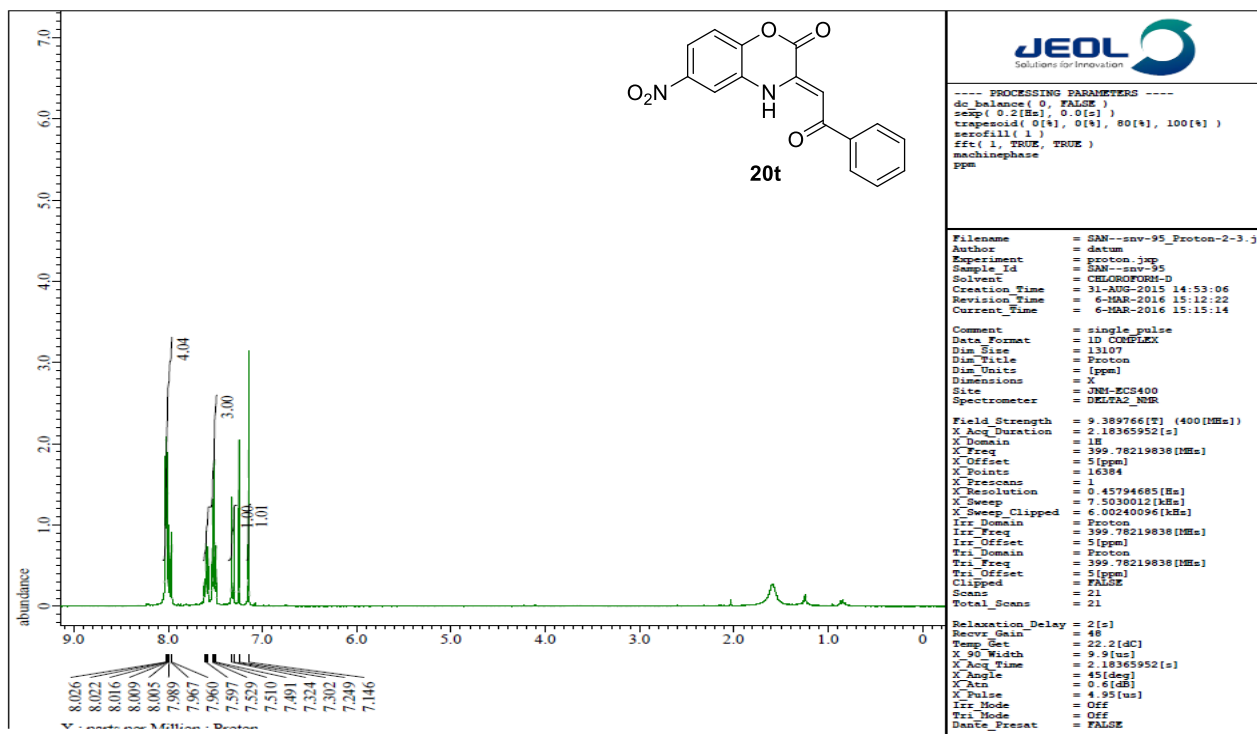

ou created this PDF from an application that is not licensed to print to novaPDF printer (<http://www.novapdf.com>)

Figure 23. <sup>1</sup>H NMR Spectra of Compound 20t.

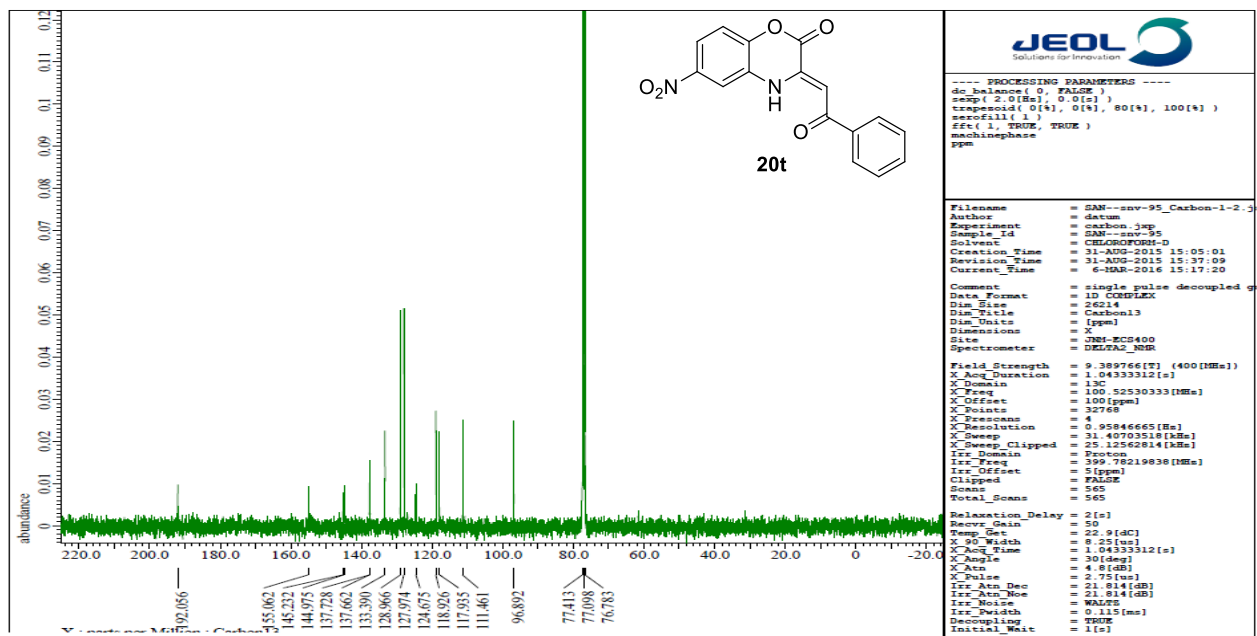

ou created this PDF from an application that is not licensed to print to novaPDF printer (<http://www.novapdf.com>)

Figure 24. <sup>13</sup>C NMR Spectra of Compound 20t.

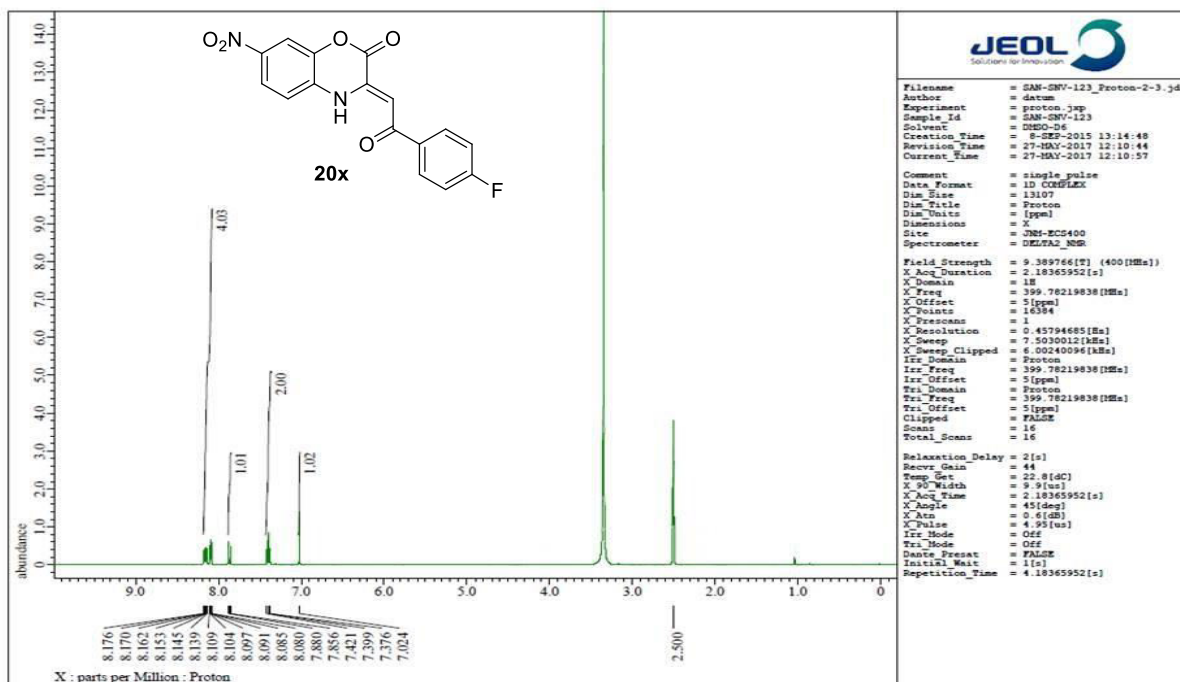

ou created this PDF from an application that is not licensed to print to novaPDF printer (<http://www.novapdf.com>)

**Figure 25.**  $^1\text{H}$  NMR Spectra of Compound **20x**.

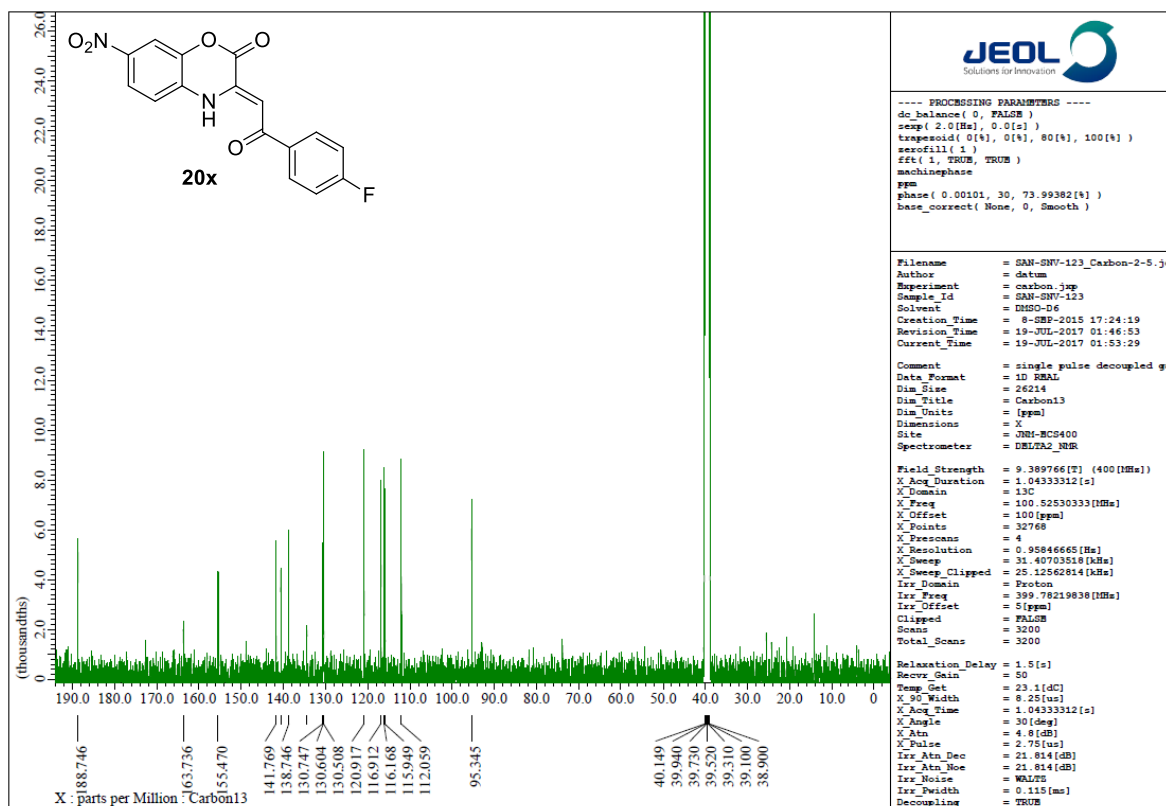

**Figure 26.**  $^{13}\text{C}$  NMR Spectra of Compound **20x**.

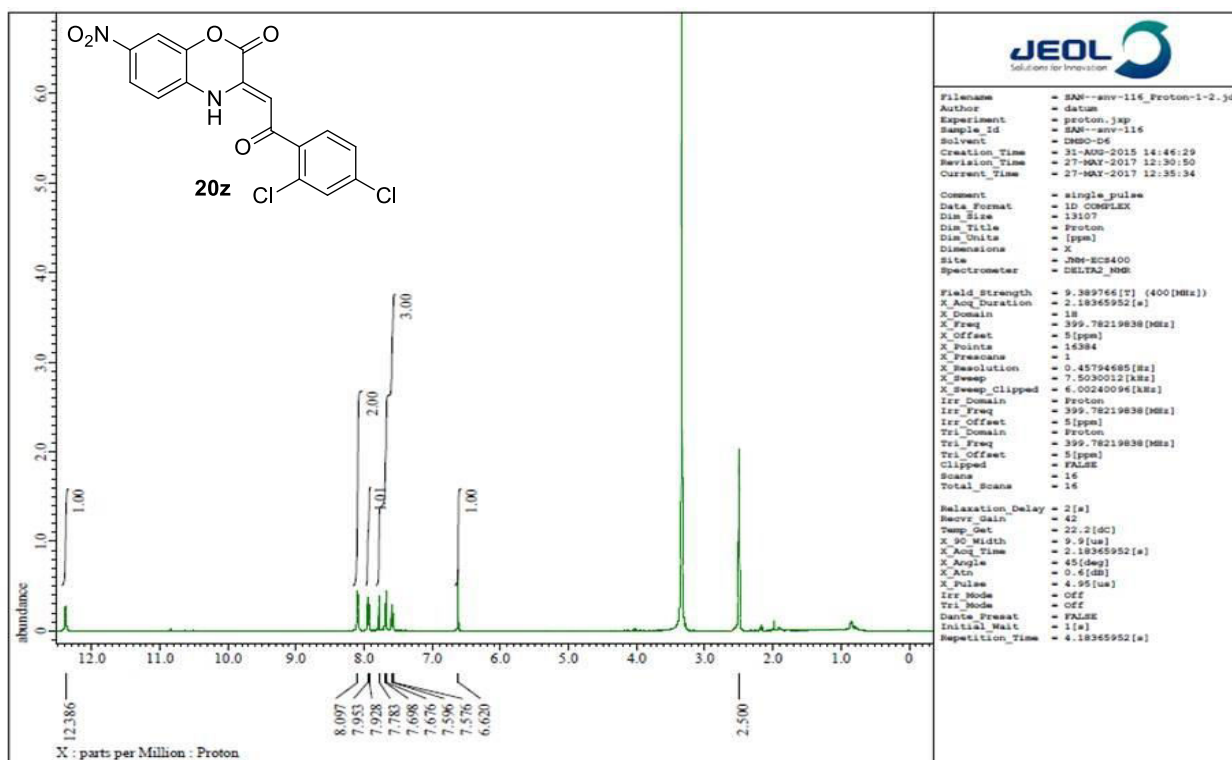

ou created this PDF from an application that is not licensed to print to novaPDF printer (<http://www.novapdf.com>)

**Figure 27.**  $^1\text{H}$  NMR Spectra of Compound **20z**.

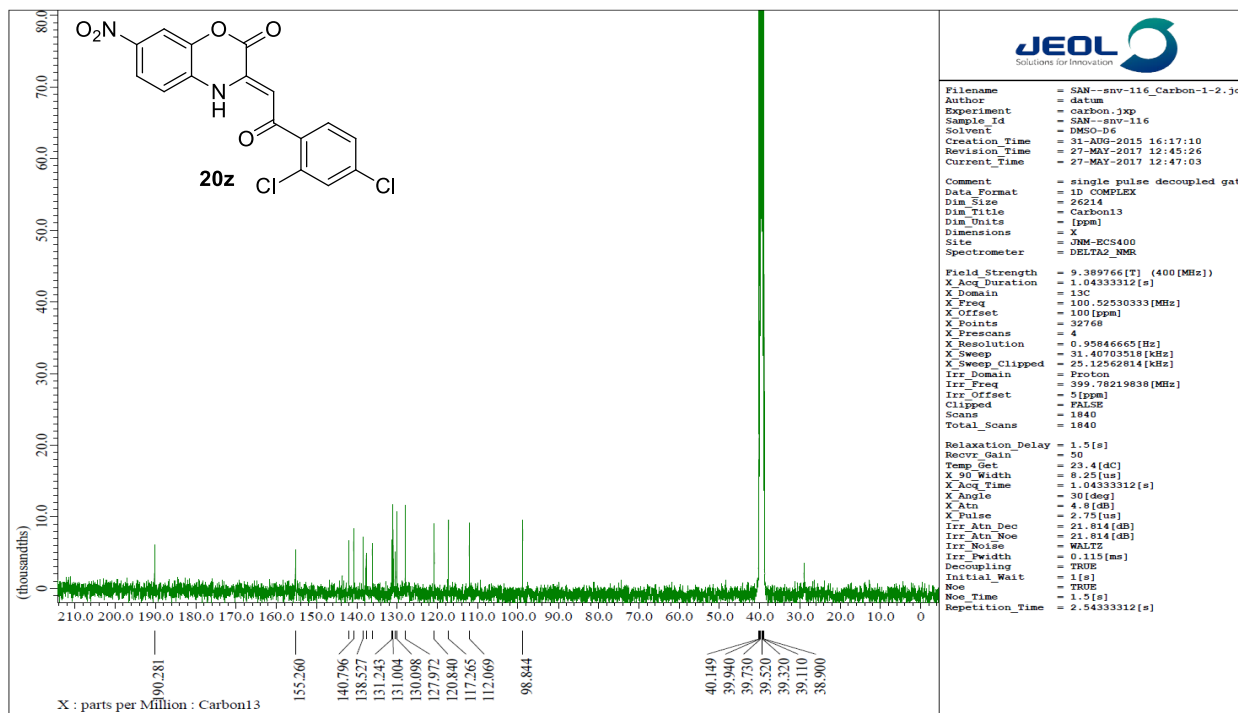

**Figure 28.**  $^{13}\text{C}$  NMR Spectra of Compound **20z**.

**Cytotoxicity Assay**

The cytotoxic effect of the active compounds prepared on cells was detected *in vitro* using the mitochondrial cytotoxic test according to Danihelová et al. (2013) with modifications. Cell viability was evaluated using thiazolyl blue tetrazolium bromide (MTT), which indicates the metabolic activity of cells. The experiment was performed in 96-well microplates. The cells were seeded at a density of  $3.5 \times 10^3$  3T3 fibroblast cells per well. Samples were dissolved in DMSO (stock solution 10 mM) and subsequently diluted in medium to the final concentration of 25  $\mu$ M to 250  $\mu$ M (concentration of DMSO 0.5%) and after 24 h they were added to the cells. Microplates were cultivated for 72 h in thermostat at 37 °C and 5% CO<sub>2</sub> atmosphere. After incubation thiazolyl blue tetrazolium bromide (3.33 mg/ml phosphate buffered saline, pH=7.4) was pipetted to each well and left to incubate for further two hours. Then the medium with MTT solution was removed. Formazan crystals in viable cells were dissolved in the lysis solution (4 mM HCl and 0.1% Nonidet P40 in ethanol). Microplates were shaken 15 min at 1500 rpm. Absorbance was measured at 540 nm and reference wavelength at 740 nm. Each value is the mean of 6 wells with standard deviation. Inhibition activity was expressed as percentages of control with DMSO.

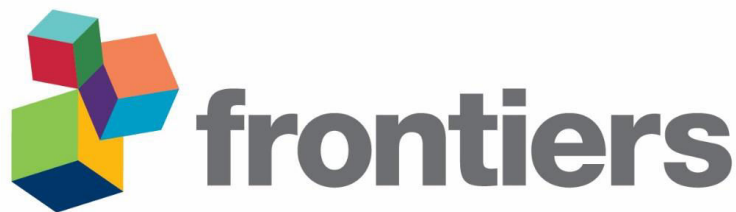

Supplement: Image1.pdf [file Image1.pdf]
